1 **Title:** On the importance of time scales when studying adaptive evolution

2 **Running title:** Time scale of bill length evolution

3 **Authors:** Charles PERRIER<sup>1</sup> & Anne CHARMANTIER<sup>1</sup>

4 **Affiliations:** <sup>1</sup>CEFE UMR 5175, CNRS, Université de Montpellier, Université Paul-Valéry Montpellier,  
5 EPHE 1919, route de Mende - 34293 Montpellier cedex 05 – France

6 Corresponding authors: Charles.perrier@cefe.cnrs.fr

7

8 **Abstract:**

9 Long-term field studies coupled with quantitative genomics offer a powerful means to understand  
10 the genetic bases underlying quantitative traits and their evolutionary changes. However, analyzing  
11 and interpreting the time scales at which adaptive evolution occurs is challenging. First, while  
12 evolution is predictable in the short term, with strikingly rapid phenotypic changes in data series, it  
13 remains unpredictable in the long term. Second, while the temporal dynamics of some loci with large  
14 effect on phenotypic variation and fitness have been characterized, this task can be complicated in  
15 cases of highly polygenic trait architecture implicating numerous small effect size loci, or when  
16 statistical tests are sensitive to the heterogeneity of some key characteristics of the genome, like  
17 recombination rate variations. After introducing these aforementioned challenges, we discuss a  
18 recent investigation of the genomic architecture and spatio-temporal variation in great tit bill length,  
19 which was related to the recent use of bird feeders. We discuss how this case study illustrates the  
20 importance of considering different temporal scales and evolutionary mechanisms both while  
21 analyzing trait temporal trends and when searching for and interpreting the signals of putative  
22 genomic footprints of selection. More generally this commentary discusses interesting challenges for  
23 unraveling the time scale at which adaptive traits evolve and their genomic bases.

24 **Key words:** Adaptation, Phenotypic variation, Long-term data series, Genome scans, Recombination

25 **Impact summary:**

26 An important goal in evolutionary biology is to understand how individual traits evolve, leading to  
27 fascinating variations in time and space. Long-term field studies have been crucial in trying to  
28 understand the timing, extent, and ecological determinants of such trait variation in wild  
29 populations. In this context, recent genomic tools can be used to look for the genetic bases  
30 underlying such trait variation and can provide clues on the nature and timing of their evolution.  
31 However, the analysis and the interpretation of the time scales at which evolution occurs remain  
32 challenging. First, analyzing long-term data series can be tricky; short-term changes are highly  
33 predictable whereas long-term evolution is much less predictable. A second difficult task is to study  
34 the architecture of complex quantitative traits and to decipher the timing and roles of the several  
35 genomic mechanisms involved in their evolution. This commentary introduces these challenges and  
36 discusses a recent investigation of the nature and timing of ecological and genomic factors  
37 responsible for variation in great tit bill length. Overall, we raise cautionary warnings regarding  
38 several conceptual and technical features and limitations when coupling analyses of long-term and  
39 genomic data to study trait evolution in wild populations.

40

41 **Main Text:**

42 Longitudinal field studies have brought invaluable insight for the understanding of  
43 evolutionary processes (Clutton-Brock & Sheldon 2010). Long-term studies notably allowed  
44 characterization of the temporality of trait variation and the strength and directionality of natural  
45 selection underlying such variation. Some of these long-term examinations of key phenotypic traits  
46 detected strikingly fast phenotypic change, driven by rapid ecological changes (Grant & Grant 2006).  
47 In contrast, many long-term studies failed to reveal micro-evolutionary change and response to  
48 selection (Merila *et al.* 2001; Pujol *et al.* 2018). While examining longitudinal data looking for both

49 long-term trends as well as short-term fluctuations has the potential to shed light on evolutionary  
50 trajectories in natural populations, our ability to understand and more notably predict evolution  
51 remains limited outside the laboratory. Quantitative genetic models were initially developed with  
52 the aim of predicting evolutionary change, based on estimates of selection and additive genetic  
53 variation (Falconer 1960). Their predictive power worked efficiently for the genetic improvement of  
54 complex traits in many animal and plant breeding programs. Yet when spatio-temporal ecological  
55 heterogeneity is involved, evolution in the wild remains largely unpredictable (Pemberton 2010;  
56 Pujol et al. 2018).

57         Coupling such long-term studies with genomic tools is a powerful way to improve our  
58 understanding of the genetic bases underlying evolutionary changes in response to environmental  
59 variation. Rapid and recent monogenic adaptations based on de-novo mutations are often used as  
60 examples, for instance the rise of the melanic morph of the peppered moth *Biston betularia*  
61 following the industrial revolution (van't Hof et al. 2016). Similarly, there are famous examples of  
62 rapid parallel monogenic or oligogenic adaptation based on long lasting standing genetic variation  
63 segregating in heterogeneous environments, for example coloration in deer mice *Peromyscus* and  
64 armor plates in stickleback *Gasterosteus aculeatus* (Barret & Hoekstra 2011; Nelson & Cresko 2018).  
65 However, these genomic analyses are facing several challenges when it comes to making inferences  
66 about polygenic adaptation and quantitative trait evolution. First, loci effect sizes are often small,  
67 requiring thousands, if not millions, of both SNPs and individuals for genome wide association  
68 studies (GWAS) to reveal significant effects. Such an investigation requires technical commitments  
69 (Wellenreuther & Hansson 2016; Gienapp et al. 2017a), but also a conceptual shift towards  
70 suppressing our desire to discover large effect alleles that are, in theory, rarely responsible for  
71 quantitative variation (Rockman 2011). Second, genome characteristics and especially variation in  
72 recombination rate along the genome can cause variation in the extent of background selection  
73 (defined as the loss of genetic diversity at a neutral locus due to negative selection against linked

74 deleterious alleles) (Charlesworth et al. 1993; Charlesworth 2012; Nordborg et al. 2009) that can  
75 confound or bias detections of positive selection and hence our comprehension of the timing and  
76 nature of evolutionary trajectories based on genomic data (Roesti et al. 2012; Burri et al. 2015;  
77 Berner & Roesti 2017; Burri 2017; Comeron 2017; Delmore et al. 2018). Nevertheless, several studies  
78 have begun to decipher the polygenic mechanisms of rapid evolution of quantitative traits.

79 Avian bill morphology has played a prominent role in empirical studies of evolution and  
80 natural selection (Lack 1947; Grant 1999), perhaps because the size and shape of bills show large  
81 variations across and within bird species, and are shaped by strong selective forces since they  
82 directly determine foraging efficiency on various food sources. For instance, the emblematic study of  
83 Darwin's finches on the Galapagos island of Daphne Mayor aimed at capturing evolutionary changes  
84 in bill size (Boag & Grant 1981; Grant & Grant 1993). From 1977 to 1978, bill size increased markedly  
85 after a severe drought in 1977. This analysis clearly demonstrated that extreme climatic events such  
86 as an *El niño* event are strong drivers of bill size evolution in this species. After 30 years of  
87 perspective, however, Grant & Grant (2002) concluded that while evolution of bill length was  
88 predictable as a rapid response to strong selection, it remained unpredictable on a slightly longer  
89 microevolutionary scale. Although the question of predictability of evolution across time scales  
90 remains challenging, even in the genomic era (Nosil et al 2018), genomic tools did provide insights on  
91 the evolution of bill size in the context of the rapid diversification of Darwin's finches. A handful of  
92 genes were found to be significantly associated with bill size and shape in the medium ground finch  
93 *Geospiza fortis* (Lamichhaney et al. 2016), among which a major locus has been shown to influence  
94 bill dimensions in the Darwin finches' entire radiation (Lamichhaney et al. 2015). These genomic  
95 analyses hence cracked the genomic architecture of this trait variation at both small and large  
96 microevolutionary scale, with the predominant control of a few large effect loci.

97 In a recent study, Bosse et al. (2017) investigated the genetic architecture of bill length in  
98 the Great tit *Parus major*, using a tremendous amount of data from long-term research programs in

99 Wytham woods in the UK and in the Netherlands (NL). Applying modern analyses of both population  
100 and quantitative genomics using 500k single nucleotide polymorphisms, the authors provide insight  
101 into the signatures of divergent selection in the studied populations and the genomic architecture of  
102 variation in bill length. In line with the quantitative nature of variation in bill length and with  
103 quantitative genetics theory (Lynch & Walsh 1998), the authors showed that the genetic architecture  
104 of bill length was highly polygenic. Specifically, the authors showed, using a mixture analysis fitting  
105 all the SNPs simultaneously, that 3009 SNPs explained collectively 31% of bill length phenotypic  
106 variation. None of these SNPs reached genome wide significance in the GWAS with bill length,  
107 revealing small effect sizes of individual variants. In accordance with recent quantitative genomic  
108 findings notably for other traits in great tits (*eg* Robinson et al. 2013), the proportion of variance in  
109 bill length explained by each chromosome amazingly scaled with its size, demonstrating that the  
110 many SNPs additively explaining bill length are distributed throughout the genome. The polygenic  
111 analysis also predicted the difference in bill length observed between the UK and the NL, further  
112 illustrating the polygenic nature of this trait variation. This evidence for a polygenic control of bill  
113 length with no large effect SNPs is hence very different from the previous example on Darwin  
114 finches' bill with large effect loci. Nevertheless, Bosse et al. (2017) also showed that variation at a  
115 single gene, *col4A5*, was associated with bill length. Bosse et al. (2017) then discussed whether an  
116 extended use of feeders, that are more abundant in the UK, might have driven the evolution of  
117 larger bills in the UK compared to the NL. Among the arguments pointing to feeders as drivers of  
118 longer bill lengths in UK great tits, Bosse et al. (2017) reported that *col4A5* was associated with bill  
119 length in the UK but not in the NL, was highly differentiated between the UK and the NL, and was  
120 associated with greater reproductive success and higher activity at feeding sites in the UK. In  
121 addition, they reported that bills were longer in the UK compared to mainland Europe (Figure 4A in  
122 Bosse et al. 2017) and increased from 1982 to 2007 in the UK (Figure 4B in Bosse et al. 2017).

123           We argue in this comment that the speculation on the role of feeder on bill length evolution  
124 is not well supported by these arguments. Based on both phenotypic and genomic data, we propose  
125 instead that differences in bill length between the UK and the NL might have been evolving on a  
126 longer time scale than the contemporary use of feeders. First, an examination of bill length  
127 monitoring shows puzzling temporal and geographic patterns that may not incriminate the use of  
128 feeders. Second, the genomic patterns found at the region containing col4A5 might be compatible  
129 with the combined effect of variation in recombination rate and background selection, hence  
130 questioning the putative recent role of feeders as agents of positive selection.

131           The bill length trend inferred from the long-term monitoring is highly dependent on the time  
132 scale considered. Inspired by the readings of papers such as the Grant & Grant (2006) study relating  
133 the effects of rare and extreme events on the evolution of phenotypic traits, we carefully inspected  
134 the evolution of bill length during the studied period, looking for particularly rapid changes. We  
135 reanalyzed the data using a breakpoint computations method (coin R-package) aiming at localizing  
136 such striking change. The best cutpoint was found between 1986 and 1987 ( $\max T = 7.41$ ,  $p\text{-value} <$   
137  $2.2E-16$ ), which corresponds to a conspicuous change in bill length. Measures from the five years  
138 preceding 1987 differed from subsequent years (t-test:  $t = -7.28$ ,  $df = 674.53$ ,  $p\text{-value} = 9.1E-13$ ).  
139 Although a linear regression through the entire period, from 1982 to 2007, as implemented by Bosse  
140 et al., yielded a positive slope, removing the five measures prior to 1987, bill length significantly  
141 decreased from 1987 to 2007 (Figure 1A, Linear model from 1987 to 2007 either taking tarsus length  
142 into account, or not,  $F = 7.13$ ,  $p\text{-value} = 8.2E-4$ ;  $F = 13.2$ ,  $p\text{-value} = 2.9E-4$ , respectively). A LOESS  
143 model confirms the decrease in bill length during the second part of the record. More generally,  
144 slopes of linear models linking bill length to time, using all of the possible combinations of 10 to 25  
145 consecutive years (simply removing 1 to 16 years at the beginning, or the end, or both, of the data-  
146 series), were often positive when including one or more data points collected between 1982 and  
147 1987, while negative slopes were often observed when excluding these years (Figure 2), further

148 illustrating that both time periods yield opposite patterns. Furthermore, tarsus length also decreased  
149 significantly both over the 1987-2007 and the 1982-2007 periods (Figure 1B,  $F = 6.61$ ,  $p\text{-value} = 0.01$   
150 &  $F = 24.07$ ,  $p\text{-value} = 9.9E-07$ , respectively). Correspondingly, the bill length / tarsus length ratio did  
151 not change significantly from 1987 to 2007 (Figure 1C,  $F = 1.51$ ,  $p\text{-value} = 0.28$ ), indicating no change  
152 in bill length, when scaled to tarsus length, over this period. The origin of this cutpoint is important  
153 to investigate, since it could constitute an evidence for a response, either genetic or plastic, of both  
154 bill and tarsus lengths to a rapid abiotic or biotic change or to a methodological change. Yet, it seems  
155 at present difficult to decipher whether bill length or tarsus length or both, if any, were targeted by  
156 selection. Indeed, both traits are commonly phenotypically and genetically positively correlated in  
157 passerines (Teplitsky et al. 2014; Poissant et al. 2016), hence should often evolve together. Overall,  
158 these results very likely rule out the possibility of a contemporary (1982-2007) positive effect of  
159 feeders on bill length.

160         One could nevertheless argue that bill length could have increased at a longer time scale  
161 than the 1982-2007 period, but still recent enough to incriminate the use of feeders. Figure 3  
162 however shows the absence of a clear pattern of bill length increase in museum specimens collected  
163 in the UK. Although more data are needed to confirm the pattern, it suggests that larger bill length in  
164 the UK seems to have evolved over a longer time period than the one during which feeders have  
165 been used. Moreover, bill length across Europe does not display a clear dichotomy between the UK  
166 and mainland Europe but rather smooth spatial variations (Figure 4), with an ANOVA showing a  
167 significant effect of country ( $p = 3.75e-07$ ) but not of sex ( $p = 0.345$ ), with UK birds indeed having  
168 longer bills compared to three other countries (France, Italy, and the NL). This spatial variation also  
169 challenges the suggestion by Bosse et al. (2017) of a recent increase in bill length in British great tits  
170 caused by feeders.

171         We then question whether the evolution of the genomic region containing the gene *col4A5*,  
172 which was the corner stone linking bill length, activity at feeders, reproductive success and divergent

173 selection, could have been influenced by recombination rate variation and background selection,  
174 rather than recent positive selection due to feeders. While the decay of LD is very fast in the great tit  
175 genome (marginal after 2kb, as shown in Figure S1 in Bosse et al. 2017, and in Figure 5A here (see  
176 supplementary material 1 for method details)), col4A5 was found in a large (>1Mb) genomic region  
177 with high long distance (20 to 200Kb) LD in the UK (Figure 5B). The  $F_{ST}$  between the UK and the NL  
178 was high along this region (Figure 5D here; figure S3A in Bosse et al. 2017). The eigenGWAS in this  
179 region was significant using both populations simultaneously for the entire set of SNPs (upper panel  
180 figure S2 in Bosse et al. 2017) and for chromosome 4A only (Figure 5E). As argued by Bosse et al.  
181 (2017), such results are compatible with recent strong positive selection in the UK over this large  
182 stretch of DNA on chromosome 4A. However, this large stretch of high LD around col4A5 was not  
183 only found in the UK but also in the NL (Figure 5C). The eigenGWAS in this region was also significant  
184 for both populations separately (Figure 5F & G). Furthermore, this large region was previously  
185 identified by Laine et al. (2016) as showing a signature of selective sweeps and reduced nucleotide  
186 diversity at the scale of the entire species distribution and not only in the UK (Sixth chromosome in  
187 Figure 2 in Laine et al. 2016). This same region was also identified as showing elevated differentiation  
188 in several lineages and populations of *Ficedula* flycatchers (Ellegren et al. 2012; Figure 1C in Burri et  
189 al. 2015). Therefore, given the existence of this large genomic region with reduced variation,  
190 increased LD, and increased divergence at several spatial scales in great tits, and in flycatchers, it  
191 seems unlikely that the mechanism shaping this region has been acting only in the UK, recently, and  
192 implying mainly positive selection. Burri et al. (2015) determined that the high differentiation and high  
193 LD at this region, shared across flycatcher lineages, was due to the effect of linked selection  
194 combined with low recombination and issued a crucial warning: “scans are likely to identify  
195 recombination-mediated elevations of differentiation not necessarily attributable to selective  
196 sweeps”. Accordingly, we propose that low recombination (potentially reflecting pericentromeric  
197 regions) and background selection in the region containing col4A5 in great tits could have resulted in



198 locally reduced genetic diversity, increased differentiation and increased LD that could have  
199 altogether mimicked signatures of recent positive selection.

200 To illustrate the general challenge raised here in differentiating recombination rate variation  
201 combined with background selection from positive selection, we present a very simple simulation of  
202 a 20Mb chromosome (hence comparable to the length of the chromosome 4A) containing a region  
203 of 1.6Mb with greatly reduced recombination (comparable to the length of the col4A5 haplotypes),  
204 with random occurrence of neutral and deleterious mutations but no beneficial ones (see  
205 supplementary material 2 for methods details). We show that for an average LD decay comparable  
206 to what was found in great tits (Figure 6A), long distance LD (Figure 6B), eigenGWAS (Figure 6C),  
207 integrated extended haplotype homozygosity (Figure 6D) and nucleotide diversity (Figure 6E) all  
208 show striking deviations in the recombination coldspot compared to the rest of the chromosome.  
209 Therefore, this simple simulation illustrates that such a pattern as that observed by Bosse et al.  
210 (2017) is compatible with the combined action of large-scale variation in recombination and  
211 background selection.

212 Neglecting the effects of variation in recombination and LD along the genome might have  
213 not only resulted in false positive footprints of selection in coldspots of recombination but also in  
214 false negatives in regions with a higher recombination rate (Berner & Roesti 2017). The large sliding  
215 window used in Bosse et al. (sliding over 200kb while the average LD is highly reduced after 2Kb)  
216 potentially worsened this problem by capturing principally elevated differentiation in large regions  
217 with increased LD possibly resulting from extended lower recombination due to structural variations.  
218 It may have also diluted narrow (*ie* narrower than the sliding window) peaks of elevated  
219 differentiation in more common regions with lower LD outside of recombination coldspots.  
220 Unfortunately, this probably relatively common caveat holds regardless of the nature of selection (*ie*  
221 positive or purifying) and is a purely mathematical problem of mismatch between the sliding window  
222 length and the extent of LD variation along the genome. It typically occurs when the unit of the

223 sliding window is the base pair instead of the centimorgan. In fact, such large sliding windows  
224 relative to the LD decay should be used as neutral local baselines to ascertain the effects of variation  
225 in LD and recombination along the genome, with local outliers detected when comparing local  
226 residuals to such baselines (Roesti 2012; Burri 2017).

227 All these considerations suggest that, although the pattern of increased divergence at  
228 col4A5 is apparently compatible with strong positive selection, as suggested by Bosse et al (2017),  
229 the combined role of background selection, strong recombination rate variation and invariably large  
230 averaging window while long distance LD is variable, should be more comprehensively tested.  
231 Correspondingly, including these factors may also uncover more variants under stronger positive  
232 selection located outside of the few low recombination regions. In this context, the causality of the  
233 associations between col4A5 and bill length, activity at feeders and reproductive success in the UK,  
234 requires further clarifications.

235 This case study offers exciting avenues of research to unravel the determinants of both  
236 recent and long-term as well as spatial variations in quantitative traits in the Great tit but also in  
237 other emblematic species displaying quantitative trait variations. Spatial trait variation could be  
238 unraveled in multi-trait GWAS using polygenic frameworks, inspired by a pioneering study on great  
239 tit breeding phenology (Gienapp et al. 2017b). Additionally, a formal selection analysis relating bill  
240 length to over-winter survival when birds are most likely to benefit from food provided by people, is  
241 required to elucidate the nature of the evolutionary forces behind bill length variation. Finally,  
242 including the effect of variation in recombination rate, background selection and LD along the  
243 genome to draw local neutral envelopes of genomic differentiation and modulate the local width of  
244 sliding windows, will likely help identify further candidate loci (Roesti et al. 2012; 2013; Burri 2017;  
245 Comeron 2017; Delmore et al. 2018). Genomic analyses performed in other populations across  
246 Europe could also help determine the timing and the nature of selection, by taking into account the  
247 temporal dynamics of the differentiation landscape (Burri 2017). We wish to conclude by

248 emphasizing the importance of integrating, or at least recognizing, the widespread and sometimes  
249 strong variation in recombination rate along genomes, which can in some circumstances distort our  
250 understanding of evolutionary processes based on genomic investigations (Roesti et al. 2012; Burri et  
251 al. 2015; Berner & Roesti 2017; Burri 2017; Comeron 2017; Delmore et al. 2018).

252

253 **Acknowledgements**

254 We thank several colleagues from the Institute of Evolutionary Sciences of Montpellier (ISEM) and  
255 from the Center for Functional and Evolutionary Ecology (CEFE), especially Paul Jay, Tim Janicke,  
256 Nicolas Bierne, Pierre-Alexandre Gagnaire, François Bonhomme, and Patrice David, for discussions  
257 regarding the impact of recombination rate variation on the landscape of diversity and  
258 differentiation. We thank Caroline Rose for comments on the English syntax. We thank the associate  
259 editor, three anonymous reviewers and JC Senar for constructive comments on previous versions of  
260 the manuscript. Both authors are presently funded by a European Research Council Starting grant –  
261 *Selection in Heterogeneous Environment* (ERC-2013-StG-337365-SHE). The authors declare no conflict  
262 of interest.

263

264 **References and Notes**

- 265 Barrett RD & Hoekstra HE (2011). Molecular spandrels: tests of adaptation at the genetic  
266 level. *Nature Reviews Genetics*, **12**, 767.
- 267 Berner D, Roesti M (2017) Genomics of adaptive divergence with chromosome-scale  
268 heterogeneity in crossover rate. *Molecular Ecology*, **26**, 6351–6369.
- 269 Boag PT, Grant PR (1981) Intense natural selection in a population of Darwin's finches  
270 (Geospizinae) in the Galapagos. *Science*, **214**, 82–85.
- 271 Bosse M, Spurgin LG, Laine VN *et al.* (2017) Recent natural selection causes adaptive evolution  
272 of an avian polygenic trait. *Science (New York, N.Y.)*, **358**, 365–368.
- 273 Burri R (2017) Interpreting differentiation landscapes in the light of long-term linked selection.  
274 *Evolution Letters*, **1**, 118–131.
- 275 Burri R, Nater A, Kawakami T *et al.* (2015) Linked selection and recombination rate variation  
276 drive the evolution of the genomic landscape of differentiation across the speciation  
277 continuum of Ficedulaflycatchers. *Genome Research*, **25**, 1656–1665.
- 278 Charlesworth B. (2013). Background selection 20 years on: the Wilhelmine E. Key 2012  
279 invitational lecture. *Journal of Heredity*, **104**(2), 161-171.
- 280 Charlesworth B., Morgan, M. T., & Charlesworth, D. (1993). The effect of deleterious mutations  
281 on neutral molecular variation. *Genetics*, **134**(4), 1289-1303.
- 282 Clutton-Brock T, Sheldon BC (2010) Individuals and populations: the role of long-term,  
283 individual-based studies of animals in ecology and evolutionary biology. *Trends in Ecology &*  
284 *Evolution*, **25**, 562–573.
- 285 Comeron JM (2017) Background selection as null hypothesis in population genomics: insights  
286 and challenges from *Drosophila* studies. *Philosophical Transactions of the Royal Society B:*  
287 *Biological Sciences*, **372**, 20160471–13.

- 288 Delmore KE, Lugo Ramos JS, Van Doren BM *et al.* (2018) Comparative analysis examining  
289 patterns of genomic differentiation across multiple episodes of population divergence in  
290 birds. *Evolution Letters*, **2**, 76–87.
- 291 Ellegren H, Smeds L, Burri R *et al.* (2012) The genomic landscape of species divergence in  
292 *Ficedula* flycatchers. *Nature*, **491**, 756–760.
- 293 Falconer, D. S. (1960). *Introduction to quantitative genetics*. Oliver And Boyd; Edinburgh; London.
- 294 Gienapp P, Fior S, Guillaume F *et al.* (2017a) Genomic Quantitative Genetics to Study Evolution  
295 in the Wild. *Trends in Ecology & Evolution*, 1–12.
- 296 Gienapp P, Laine VN, Mateman AC, Van Oers K, Visser ME (2017b) Environment-Dependent  
297 Genotype-Phenotype Associations in Avian Breeding Time. *Frontiers in Genetics*, **8**, 1392–9.
- 298 Grant BR, Grant PR (1993) Evolution of Darwin's Finches Caused by a Rare Climatic Event.  
299 *Proceedings of the Royal Society B-Biological Sciences*, **251**, 111–117.
- 300 Grant PR (1999) *Ecology and evolution of Darwin's finches*. Princeton University Press.
- 301 Grant PR, Grant BR (2002) Unpredictable Evolution in a 30-Year Study of Darwin's Finches.  
302 *Science*, **296**, 707–711.
- 303 Grant PR, Grant BR (2006) Evolution of character displacement in Darwin's finches. *Science (New*  
304 *York, N.Y.)*, **313**, 224–226.
- 305 Haller BC & Messer PW (2017) SLiM 2: Flexible, interactive forward genetic  
306 simulations. *Molecular Biology and Evolution* **34**, 230–240.
- 307 Lack D (1947) *Darwin's finches*. Cambridge University Press, London.
- 308 Laine VN, Gossmann TI, Schachtschneider KM *et al.* (2016) Evolutionary signals of selection on  
309 cognition from the great tit genome and methylome. *Nature Communications*, **7**, 1–9.
- 310 Lamichhaney S, Berglund J, Almén MS *et al.* (2015) Evolution of Darwin's finches and their beaks  
311 revealed by genome sequencing. 1–16.
- 312 Lamichhaney S, Han F, Berglund J, Wang C, 2016 A beak size locus in Darwin's finches facilitated  
313 character displacement during a drought. *science.sciencemag.org*
- 314 Lynch M, Walsh B (1998) *Genetics and Analysis of Quantitative Traits*. Sinauer Associates  
315 Incorporated.
- 316 Merila J, Sheldon BC, Kruuk LE (2001) Explaining stasis: microevolutionary studies in natural  
317 populations. *Genetica*, **112-113**, 199–222.
- 318 Nelson TC & Cresko WA (2018). Ancient genomic variation underlies repeated ecological  
319 adaptation in young stickleback populations. *Evolution Letters*, **2**, 9-21.
- 320 Nordborg M, Charlesworth B, & Charlesworth D (1996). The effect of recombination on  
321 background selection. *Genetics Research*, **67**, 159-174.
- 322 Poissant J, Morrissey MB, Gosler AG, Slate J, Sheldon BC (2016) Multivariate selection and  
323 intersexual genetic constraints in a wild bird population. *Journal of Evolutionary Biology*, **29**,  
324 2022–2035.
- 325 Pemberton JM (2010) Evolution of quantitative traits in the wild: mind the ecology. *Philosophical*  
326 *Transactions of the Royal Society of London B: Biological Sciences*, **365**, 2431-2438.
- 327 Pujol B, Blanchet S, Charmantier A *et al.* (2018) The Missing Response to Selection in the Wild.  
328 *Trends in Ecology & Evolution*, 1–10.
- 329 Rockman MV (2011) The QTN program and the alleles that matter for evolution: all that's gold  
330 does not glitter. *Evolution*, **66**, 1–17.
- 331 Roesti M, Hendry AP, Salzburger W, Berner D (2012) Genome divergence during evolutionary  
332 diversification as revealed in replicate lake–stream stickleback population pairs. *Molecular*  
333 *Ecology*, **21**, 2852–2862.
- 334 Roesti M, Moser D, Berner D (2013) Recombination in the threespine stickleback genome-  
335 patterns and consequences. *Molecular Ecology*, **22**, 3014–3027.

- 336 Teplitsky C, Tarka M, Møller AP *et al.* (2014) Assessing Multivariate Constraints to Evolution  
337 across Ten Long-Term Avian Studies. **9**, e90444–15.
- 338 van't Hof AE, Campagne P, Rigden DJ, Yung CJ, Lingley J, Quail MA [...] & Saccheri IJ (2016). The  
339 industrial melanism mutation in British peppered moths is a transposable  
340 element. *Nature*, **534**, 102.
- 341 Wellenreuther M, Hansson B (2016) Detecting Polygenic Evolution: Problems, Pitfalls, and  
342 Promises. *Trends in Genetics*, **32**, 155–164.
- 343

344 **Figures legends**

345 Figure 1. Decrease of mean bill length (A) and tarsus length (B) but conservation of the allometry  
346 between both traits (C), from 1987 to 2007 (red lines) in Wytham great tits. Regressions from  
347 1982 to 2007 as in the original paper by Bosse et al. are shown by the blue lines. Dots and bars  
348 illustrate means and standard errors, respectively, for each year for each variable. Shaded areas  
349 represent 95% standard error around regressions lines.

350

351 Figure 2. Slopes of linear models of bill length temporal evolution, including every possible  
352 combination of 10 to 25 consecutive years of data, with or without one to several years of data  
353 from 1982 to 1986.

354

355 Figure 3. Variation in mean bill length in the UK from 1850 to 2007, based on museum records  
356 used in Bosse et al. 2017.

357

358 Figure 4. Variation in bill length across European countries for both female (in blue) and male (in  
359 green) great tit specimens from museums. Letters A and B illustrate significant differences  
360 between sites and 'ns' refers to non-significant differences (Tukey HSD).

361

362 Figure 5. Genomic re-analysis of the chromosome 4A using the data from Bosse et al (2017). A)  
363 Smoothed linkage disequilibrium (LD) decay with genomic distance in UK and NL (pooled) great  
364 tits; Smoothed long distance (between SNPs distant from 20 to 200Kb) LD variation in UK (B) and  
365 NL (C); D) Single-marker  $F_{ST}$  between UK and NL; Single-marker significance of eigenGWAS for

366 chromosome A4 in the entire sample (E) and only UK (F) and NL (G). The grey area indicates the  
367 region in which col4A5 is located.

368

369 Figure 6. Genomic analysis of a 20Mb chromosome evolving in a single population, with a 1.6Mb  
370 region of reduced recombination (indicated by a grey area), and random occurrence of neutral  
371 and deleterious mutations and absence of beneficial mutations, simulated in SLiM. A) Smoothed  
372 LD decay with genomic distance, B) Smoothed long distance (between sites distant from 20 to  
373 200Kb) LD variation, C) Single-marker and smoothed significance of eigenGWAS, D) Single-  
374 marker and smoothed integrated Extended Haplotype Homozygosity (iES), E) 200kb and  
375 smoothed nucleotide diversity.

376

377 Supplementary material 1. Reanalysis of the COL4A5 region. We downloaded the SNP dataset  
378 from Bosse et al. 2017 and used vcftools (Danecek et al. 2011) to estimate LD across the  
379 genome for the entire dataset. We then estimated LD for both populations separately along the  
380 chromosome 4A. To represent long distance LD, we kept LD values between each pairs of  
381 markers distant from 20kb to 200kb. We smoothed these statistics using the loess function  
382 native to R. We estimated  $F_{ST}$  using Plink (Purcell et al. 2007). We performed eigenGWAS tests  
383 (Chen et al. 2017) in the UK, the NL and both. EigenGWAS were performed in chromosome 4A  
384 only and not on the entire genome, in order to be more comparable with the simulation outputs  
385 on one chromosome. Results from whole genome eigenGWAS can be found in figure S2 in Bosse  
386 et al. (2017).

387



388 Supplementary material 2. Simulation of a chromosome similar in size to the chromosome 4A in  
389 great tit, and containing a region of reduced recombination of approximately the same size as  
390 the COL4A5 region. We used SLiM (Haller et al. 2017) to simulate a very simple scenario of  
391 reduced recombination in a 1.6Mb region within a 20Mb long chromosome. Recombination rate  
392 was equal to  $1e-5$  from 0 to 11.5Kb and from 13.1Kb to 20Mb. Recombination rate was equal to  
393  $1e-100$  11.5Kb to 13.1Kb. Population size was equal to 1000. Simulation lasted 2000  
394 generations. Mutation rate was  $1e-7$ . We implemented 3 types of mutations: i) neutral, 50% of  
395 the mutations, ii) slightly deleterious (fitness effect of -0.1), 25% of the mutations, iii) severely  
396 deleterious (fitness effect of -0.9), 25% of the mutations. We exported a VCF dataset containing  
397 about 8500 SNPs from a randomly chosen simulation. We used vcftools to estimate LD across  
398 the chromosomes and nucleotide diversity (PI) over 200 kb windows. To represent long distance  
399 LD, we kept LD values between each pairs of markers distant from 20kb to 200kb. We  
400 performed eigenGWAS tests (Chen et al. 2017). We estimated iES (Sabesti et al. 2007) using the  
401 R package rehh (Gautier et al. 2016). We smoothed statistics using the loess function native to  
402 R.

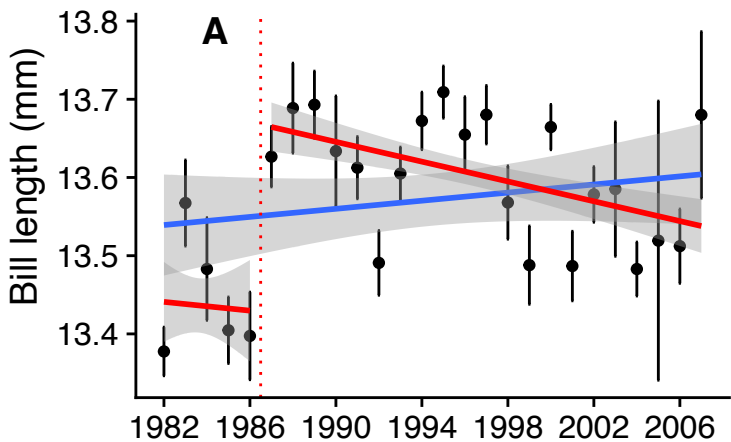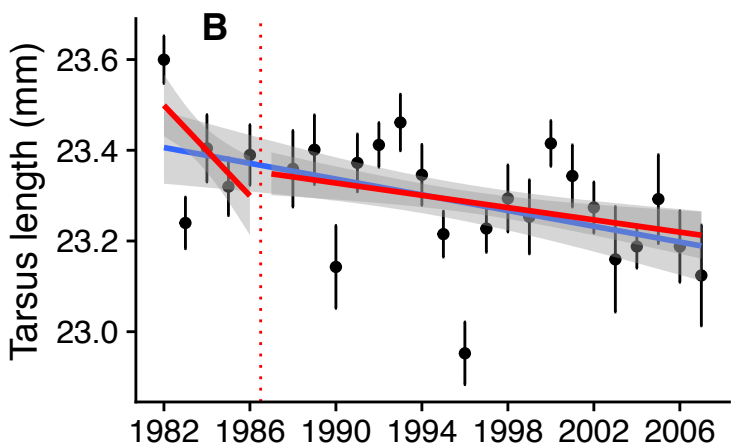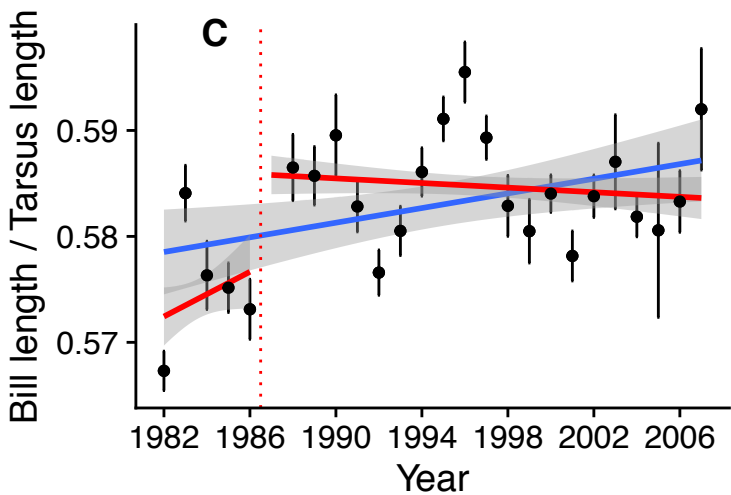

\*including every possible combinations  
of 10 to 25 consecutive years of data

all the models

significant models

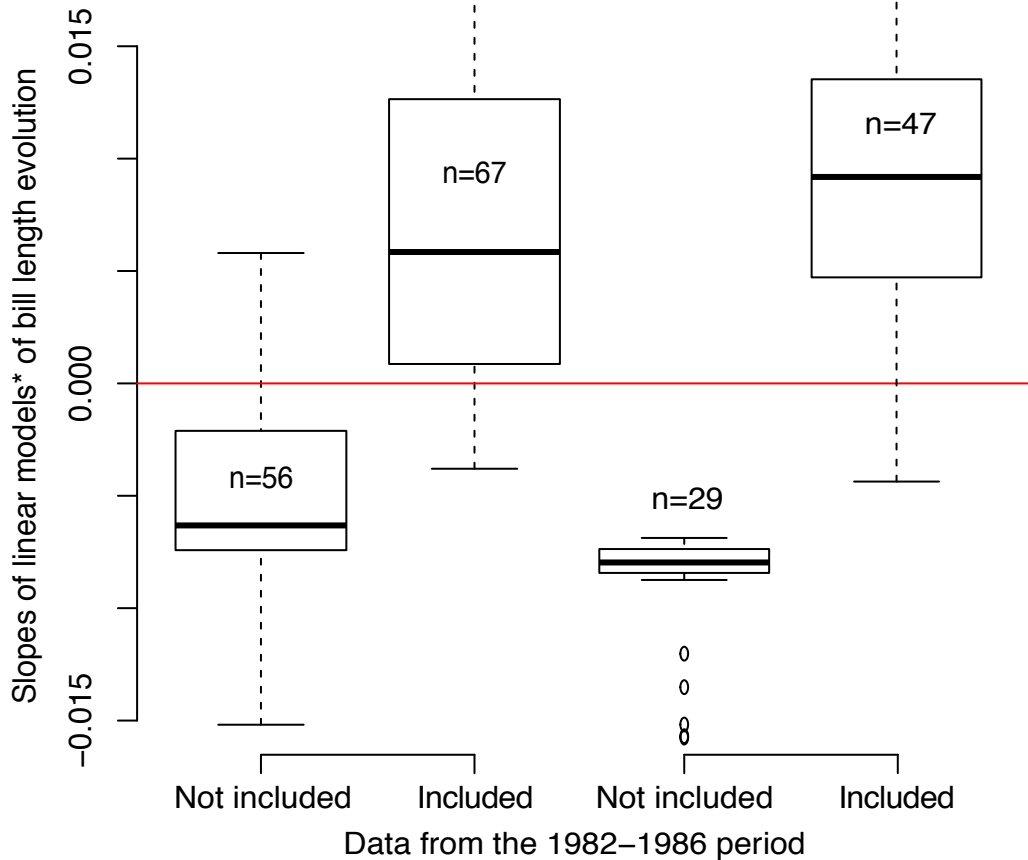

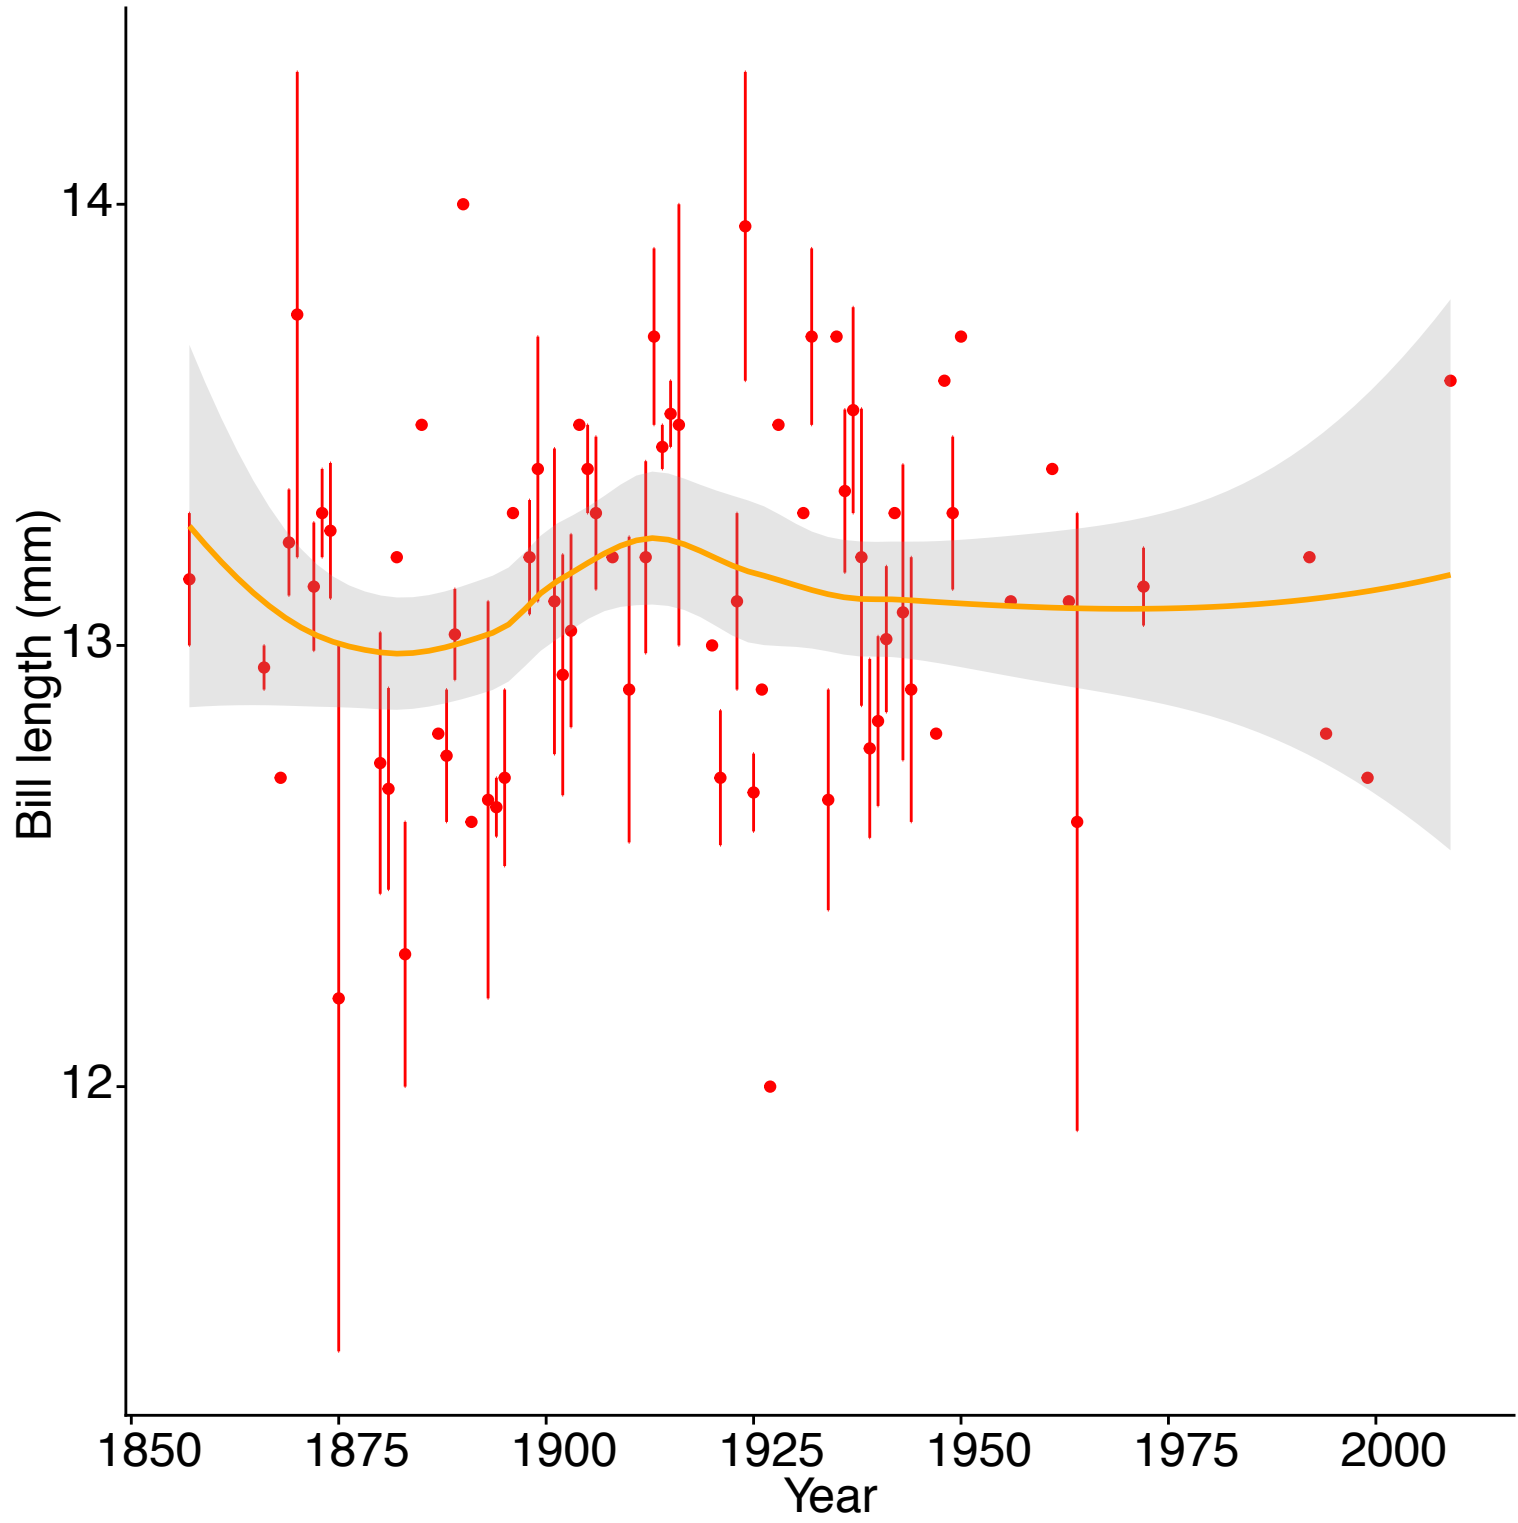

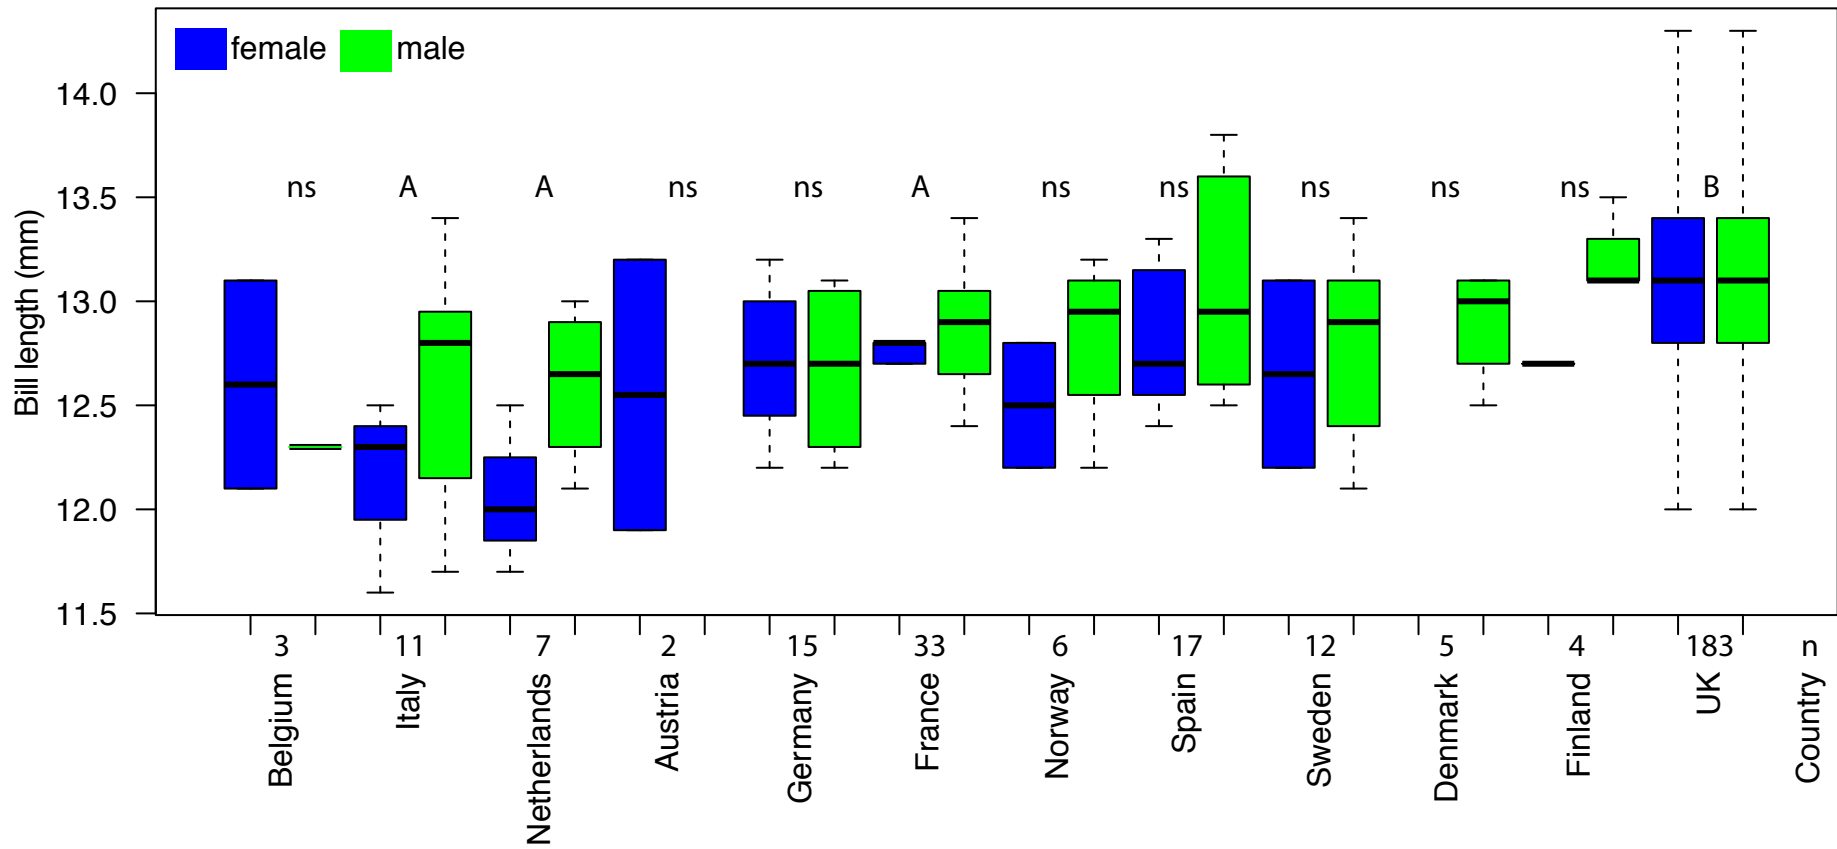

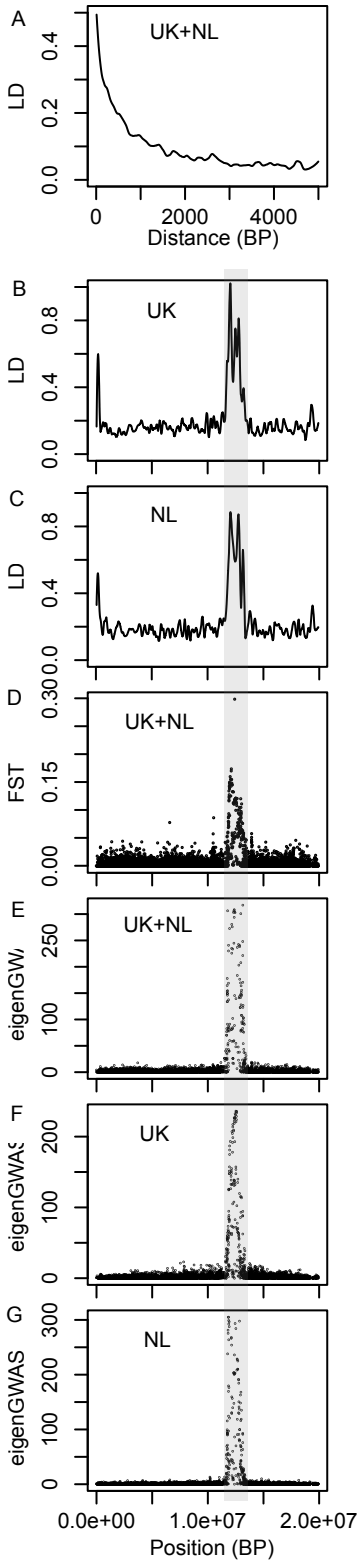

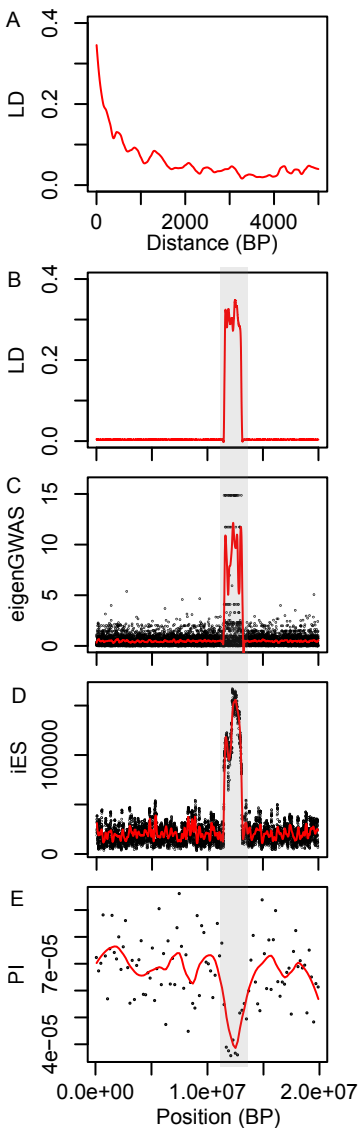

Source: https://www.biorxiv.org/content/10.1101/269175v5.full.pdf
